# Supplementary material for: Enhancing visual luminescence detection of tetracycline antibiotics through regulation of nitrogen-containing ligand and antenna effect of Ln3+
Source: Royal Society of Chemistry journal article supplement (doi:10.1039/d4tc02735c), 2024-01-01
Supplement: d4tc02735c1.pdf [file d4tc02735c1.pdf]

*Supporting Information for*

**Enhancing visual fluorescence detection of tetracycline antibiotics through  
regulation of nitrogen-containing ligand and antenna effect of Ln<sup>3+</sup>**

Tingting Liu<sup>a</sup>, Mengna Ji<sup>a</sup>, Jun Zheng<sup>a</sup>, Nana Liu<sup>a</sup>, Hongguo Hao<sup>a</sup>, Jianmin Dou<sup>a</sup>,  
Jingjing Jiang<sup>b</sup>, Yunwu Li<sup>a\*</sup>, Suna Wang<sup>a\*</sup>

[a] Shandong Provincial Key Laboratory of Chemical Energy Storage and Novel Cell  
Technology, School of Chemistry and Chemical Engineering, Liaocheng University,  
Liaocheng, 252059, P. R. China

[b] Institute of Analysis and Testing, Beijing Academy of Science and Technology  
(Beijing Center for Physical and Chemical Analysis), Beijing 100094, P. R. China

Email: [liyunwu@lcu.edu.cn](mailto:liyunwu@lcu.edu.cn); [wangsuna@lcu.edu.cn](mailto:wangsuna@lcu.edu.cn)

## Table of Content

**Table S1.** Crystal structure data and refinement parameters of **LCU-127** and **LCU-128**.

**Table S2.** Selected bond lengths [ $\text{\AA}$ ] and angles [ $^\circ$ ] for **LCU-127** and **LCU-128**.

**Table S3.** The reported CPs/MOFs as sensors for TC detection.

**Fig. S1** (a) and (c) Coordination mode of  $\text{H}_3\text{L}$  in **LCU-127** and **LCU-128**, respectively. (b) and (d) Coordination mode of  $\text{tlytb}$  and  $\text{tpytz}$  in **LCU-127** and **LCU-128**, respectively. (e) and (f) Stacking interactions of **LCU-127** and **LCU-128** between adjacent layers, respectively.

**Fig. S2** (a) and (b) PXRD spectra of **LCU-127** and **LCU-128** after soaking in  $\text{H}_2\text{O}$  and different pH solutions, respectively. (c) and (d) PXRD spectra of **LCU-127** and **LCU-128** after soaking in different organic solvents for three days, respectively.

**Fig. S3** TG of **LCU-127** and **LCU-128**, respectively.

**Fig. S4** (a) Solid-state emission spectra and (b) CIE coordinates of **LCU-127** and **LCU-128**.

**Fig. S5** (a) The detection limit calculation and (b) time-dependent response of **LCU-128** toward TC.

**Fig. S6** (a) and (b) The luminescence intensity of **LCU-128** suspensions of common cations, anions, and some common organic matters with and without TC, respectively.

**Fig. S7** (a)-(g) Luminescence intensity of **LCU-128** toward TC in  $\text{NaCl}$ ,  $\text{Na}_2\text{SO}_4$  solutions, temperature at  $0\text{ }^\circ\text{C}$  and room temperature ( $25\text{ }^\circ\text{C}$ ) and pH at 5, 6, 8, and 9, respectively.

**Fig. S8** (a) and (c) Emission spectra of **LCU-128** dispersed in  $\text{NaCl}$  and  $\text{Na}_2\text{SO}_4$  upon incremental addition of TC (insets: the corresponding S-V plots), respectively. (b) and (d) The detection limit calculation of **LCU-128** toward TC in  $\text{NaCl}$  and  $\text{Na}_2\text{SO}_4$  solutions, respectively.

**Fig. S9** (a) PXRD spectra of **LCU-128** after soaking in aqueous solution of TC. (b) Excitation and emission spectra of **LCU-128** and UV-vis absorption spectra of antibiotic solutions ( $10^{-4}\text{ M}$ ).

**Fig. S10** (a) Fluorescence lifetimes of **LCU-128** in the presence and absence of TC. (b) HOMO and LUMO energy levels for  $\text{H}_3\text{L}$  and TC.

**Fig. S11** (a)-(d) XPS spectra of **LCU-128** before and after immersion in TC and high resolution regions of  $\text{Cd}3\text{d}$ ,  $\text{N}1\text{s}$  and  $\text{O}1\text{s}$ .

**Fig. S12** Time-dependent intensity of **LCU-127** toward  $\text{Tb}^{3+}$  at  $545\text{ nm}$ .

**Fig. S13** Luminescence intensity of **LCU-127** in  $\text{Ln}^{3+}$  aqueous solutions with or without  $\text{Tb}^{3+}$  at 545 nm.

**Fig. S14** PXRD spectra of **LCU-127** after soaking in aqueous solution of  $\text{Tb}^{3+}$ .

**Fig. S15** (a) and (b) SEM images of **LCU-127** before and after immersing in  $10^{-3}$  M  $\text{Tb}^{3+}$  aqueous solutions for three days, respectively.

**Fig. S16** EDS mapping of **LCU-127** after immersing in  $10^{-3}$  M  $\text{Tb}^{3+}$  aqueous solutions for three days.

**Fig. S17** (a) Luminescence lifetime curves of **LCU-127**,  $\text{Tb}^{3+}$ +**LCU-127** and  $\text{Tb}^{3+}$ +**LCU-127** in OTC aqueous solutions. (b) The photographs of **LCU-127** in different solutions under 254 nm UV lamp (1: **LCU-127**- $\text{H}_2\text{O}$ ; 2: **LCU-127**- $\text{Tb}^{3+}$ ; 3:  $\text{Tb}^{3+}$ +**LCU-127**-TC, 4:  $\text{Tb}^{3+}$ +**LCU-127**-OTC)).

**Fig. S18** (a) Time-dependent response of  $\text{Tb}^{3+}$ +**LCU-127** toward OTC. (b) The recycling experiment of  $\text{Tb}^{3+}$ +**LCU-127** toward OTC within five runs.

**Fig. S19** (a)-(g) Luminescence intensity of  $\text{Tb}^{3+}$ +**LCU-127** in NaCl,  $\text{Na}_2\text{SO}_4$  solutions, at 0 °C and room temperature (25 °C) as well as in aqueous solutions with pH value of 5, 6, 8, and 9, respectively.

**Fig. S20** (a) and (c) Emission spectra of  $\text{Tb}^{3+}$ +**LCU-127** dispersed in NaCl and  $\text{Na}_2\text{SO}_4$  solutions upon incremental addition of OTC (insets: the corresponding S-V plots), respectively. (b) and (d) The detection limit calculation of  $\text{Tb}^{3+}$ +**LCU-127** toward OTC in NaCl and  $\text{Na}_2\text{SO}_4$  solutions, respectively.

**Fig. S21** (a) and (c) XRD patterns and SEM image of MMM based on  $\text{Tb}^{3+}$ +**LCU-127**. (b) and (d) XRD patterns and SEM image of MMM based on **LCU-128**.

## Materials and characterization.

The reagents used in the experiment include Tetrahydrofuran (THF), Methanol (MeOH), Ethanol (EtOH), N,N-Dimethylformamide (DMF), N,N-Dimethylacetamide (DMA), Dichloromethane (CH<sub>2</sub>Cl<sub>2</sub>), acetone, Acetonitrile (CH<sub>3</sub>CN), Ethyl acetate (EA), Dimethyl sulfoxide (DMSO), 4-Aminophenol (4-Ap), 3-Aminophenol (3-Ap), *o*-Phenylenediamine (*o*-PD), *m*-Phenylenediamine (*m*-PD), 4-(3,5-dicarboxylatobenzoyloxy) benzoic acid (H<sub>3</sub>L) and 1,3,5-tris(1,2,4-tiazol-1-ylmethyl)-2,4,6-trimethylbenzene (ttytb) and 2,4,6-tris(4-pyridyl)-1,3,5-triazine(tpytz) were purchased from Jinan Henghua. Other reagents (A. R. grade) were commercially purchased and used as received without further purification. Powder X-ray diffraction (PXRD) data were collected over the  $2\theta$  range of 5–50° using a SmartLab diffractometer with Cu K $\alpha$  radiation ( $\lambda = 1.5418 \text{ \AA}$ ) at room temperature. Thermal analyses were performed on STA 449 F5 Jupiter instrument from room temperature to 800 °C with a heating rate of 10 °C/min under flowing nitrogen. Luminescence sensing properties were recorded on the Hitachi F-7000 Luminescence spectrophotometer. X-ray photoelectron spectroscopy (XPS) characterization was carried out by using a Thermo Fisher Scientific ESCALAB Xi+ spectrometer with Al K $\alpha$  X-rays (1486.6 eV) as the light source and C 1s at 284.8 eV was used as a reference for all the all binding energies. UV-vis measurements were conducted with a UH 4150 spectrophotometer.

## X-ray crystallographic study.

Single crystal X-ray diffraction data of **LCU-127** was collected on a Siemens Smart CCD diffractometer with graphite-monochromatic Mo K $\alpha$  radiation ( $\lambda = 0.71073 \text{ \AA}$ ) at 293(2) K. Single crystal X-ray diffraction data of **LCU-128** was collected with an Agilent Xcalibur Eos Gemini CCD diffractometer at 293(2) K with Cu K $\alpha$  radiation ( $\lambda = 1.54184 \text{ \AA}$ ). Both structures were solved by direct method and refined by full matrix least-squares technique. Nonhydrogen atoms are refined by anisotropic temperature parameters. The hydrogen atoms of carbon and oxygen atoms were placed in the calculated positions using isotropic thermal displacement parameters. Combined with the results of TG and elemental analysis, the SQUEEZE command was carried out to calculate the number of lattice water and DMF molecules because the positions of solvent molecules cannot be located from the diffraction peak. The CCDC number for **LCU-127** and **LCU-128** are 2363067 and 2363068.

### **Sensing antibiotics.**

2 mg of ground samples (**LCU-127** and **LCU-128**) were added to 3.0 mL of solutions containing antibiotics ( $10^{-4}$  M, tetracycline (TC), chlortetracycline (CTC), oxytetracycline (OTC), ampicillin (AMP), erythromycin (EM), metronidazole (MDZ), ornidazole (ODZ), ronidazole (RDZ), nitrofurantoin (NFT), nitrofurazone (NZF), sulfadiazine (SDZ), sulfamethazine (SMZ), and thiamphenicol (TAP)) to form stable suspensions after ultrasounded for 30 minutes.

### **Sensing cations.**

2 mg of ground samples of **LCU-127** and **LCU-128** were added to 3.0 mL aqueous solutions ( $10^{-3}$  M) of different metal salts ( $\text{Eu}(\text{NO}_3)_3 \cdot 6\text{H}_2\text{O}$ ,  $\text{Tb}(\text{NO}_3)_3 \cdot 6\text{H}_2\text{O}$ ,  $\text{Sm}(\text{NO}_3)_3 \cdot 6\text{H}_2\text{O}$ ,  $\text{Gd}(\text{NO}_3)_3 \cdot 5\text{H}_2\text{O}$ ,  $\text{La}(\text{NO}_3)_3 \cdot 6\text{H}_2\text{O}$ ,  $\text{Ce}(\text{NO}_3)_3 \cdot 6\text{H}_2\text{O}$ ,  $\text{Nd}(\text{NO}_3)_3 \cdot 6\text{H}_2\text{O}$ ,  $\text{HoCl}_3 \cdot 6\text{H}_2\text{O}$ ,  $\text{Er}(\text{NO}_3)_3 \cdot 5\text{H}_2\text{O}$ ,  $\text{Pr}(\text{NO}_3)_3 \cdot 5\text{H}_2\text{O}$ ,  $\text{Tm}(\text{NO}_3)_3 \cdot 5\text{H}_2\text{O}$ ,  $\text{Yb}(\text{NO}_3)_3 \cdot 6\text{H}_2\text{O}$ ,  $\text{Lu}(\text{NO}_3)_3 \cdot 6\text{H}_2\text{O}$ , and  $\text{Dy}(\text{NO}_3)_3 \cdot 6\text{H}_2\text{O}$ , forming stable suspensions after ultrasounded for 30 minutes.

### **Titration, anti-interference and recycling experiments.**

The titration experiments were carried out as follows: Different amount of  $\text{Tb}^{3+}$  ( $10^{-3}$  M) or TC ( $10^{-4}$  M) was added to the suspensions of **LCU-127** or **LCU-128** (2 mg/3.0 mL). For OTC, 2 mg well ground **LCU-127** samples were dispersed in a solution of  $\text{Tb}^{3+}$  ( $10^{-3}$  M, 1.0 mL), and different amount of OTC solution ( $10^{-4}$  M) was added gradually.

The anti-interference experiment of **LCU-127** toward  $\text{Tb}^{3+}$  was performed as below:  $\text{Tb}^{3+}$  ( $10^{-3}$  M, 1.5 mL) and other metal ions ( $10^{-3}$  M, 1.5 mL) were mixed to form suspensions with well ground sample of **LCU-127** (2 mg). In the experiment of **LCU-128** toward TC, a solution of TC ( $2 \times 10^{-4}$  M, 1.5 mL) was mixed with other antibiotics ( $2 \times 10^{-4}$  M, 1.5 mL), common cations (nitrate salt of  $\text{NH}_4^+$ ,  $\text{Al}^{3+}$ ,  $\text{Mg}^{2+}$ ,  $\text{Na}^+$ ,  $\text{Cu}^{2+}$ ,  $\text{Ca}^{2+}$ ,  $\text{K}^+$ ,  $1 \times 10^{-3}$  M, 1.5 mL), anions (sodium salt of  $\text{CO}_3^{2-}$ ,  $\text{NO}_3^-$ ,  $\text{OH}^-$ ,  $\text{SO}_4^{2-}$ ,  $\text{Cl}^-$ ,  $1 \times 10^{-3}$  M, 1.5 mL), organic matters (EtOH, DMF,  $\text{CH}_2\text{Cl}_2$ ,  $\text{CH}_3\text{CN}$ , EA, DMSO, acetone, 1.5 mL) or aqueous solutions of 4-Ap, 3-Ap, *o*-PD, *m*-PD ( $1 \times 10^{-3}$  M, 1.5 mL). Well ground samples of **LCU-128** (2 mg) were dispersed into the aftermentioned solutions to form stable suspensions.

In the recycling experiment, the samples after sensing were collected by centrifugation and cleaned thoroughly with  $\text{H}_2\text{O}$  (for TC) or  $\text{Tb}(\text{NO}_3)_3$  solution (for OTC) for re-measurement.

### **Calculation of the HOMO and LUMO.**

The HOMO and LUMO energy levels were calculated at the B3PW91/6-31G accuracy level by density functional theory (DFT), using the Gaussian 09 package of programs. The harmonic frequency was calculated to make sure that the acquired structure was the local minimum. Gaussian 09, Revision B.01, M. J. Frisch, G. W. Trucks, H. B. Schlegel, G. E. Scuseria, M. A. Robb, J. R. Cheeseman, G. Scalmani, V. Barone, B. Mennucci, G. A. Petersson, H. Nakatsuji, M. Caricato, X. Li, H. P. Hratchian, A. F. Izmaylov, J. Bloino, G. Zheng, J. L. Sonnenberg, M. Hada, M. Ehara, K. Toyota, R. Fukuda, J. Hasegawa, M. Ishida, T. Nakajima, Y. Honda, O. Kitao, H. Nakai, T. Vreven, J. A. Montgomery, Jr., J. E. Peralta, F. Ogliaro, M. Bearpark, J. J. Heyd, E. Brothers, K. N. Kudin, V. N. Staroverov, T. Keith, R. Kobayashi, J. Normand, K. Raghavachari, A. Rendell, J. C. Burant, S. S. Iyengar, J. Tomasi, M. Cossi, N. Rega, J. M. Millam, M. Klene, J. E. Knox, J. B. Cross, V. Bakken, C. Adamo, J. Jaramillo, R. Gomperts, R. E. Stratmann, O. Yazyev, A. J. Austin, R. Cammi, C. Pomelli, J. W. Ochterski, R. L. Martin, K. Morokuma, V. G. Zakrzewski, G. A. Voth, P. Salvador, J. J. Dannenberg, S. Dapprich, A. D. Daniels, O. Farkas, J. B. Foresman, J. V. Ortiz, J. Cioslowski, and D. J. Fox, Gaussian, Inc., Wallingford CT, 2010.

**Table S1** Crystal structure data and refinement parameters of **LCU-127** and **LCU-128**.

| Compound                                          | LCU-127                                                           | LCU-128                                                         |
|---------------------------------------------------|-------------------------------------------------------------------|-----------------------------------------------------------------|
| Formula                                           | C <sub>37</sub> H <sub>44</sub> CdN <sub>10</sub> O <sub>11</sub> | C <sub>34</sub> H <sub>23</sub> CdN <sub>6</sub> O <sub>8</sub> |
| Formula weight                                    | 917.22                                                            | 755.99                                                          |
| <i>T</i> [K]                                      | 293(2)                                                            | 293(2)                                                          |
| Crystal system                                    | Triclinic                                                         | Triclinic                                                       |
| Space group                                       | <i>P</i> -1                                                       | <i>P</i> -1                                                     |
| <i>a</i> [Å]                                      | 10.1521(11)                                                       | 10.1731(5)                                                      |
| <i>b</i> [Å]                                      | 13.6394(13)                                                       | 11.7031(7)                                                      |
| <i>c</i> [Å]                                      | 15.1144(14)                                                       | 13.1709(7)                                                      |
| $\alpha$ [°]                                      | 103.171(3)                                                        | 85.370(5)                                                       |
| $\beta$ [°]                                       | 99.798(2)                                                         | 89.565(4)                                                       |
| $\gamma$ [°]                                      | 101.474(3)                                                        | 76.003(5)                                                       |
| <i>V</i> [Å <sup>3</sup> ]                        | 1945.5(3)                                                         | 1516.45(15)                                                     |
| <i>Z</i>                                          | 2                                                                 | 2                                                               |
| <i>D</i> <sub>calcd.</sub> [g·cm <sup>-3</sup> ]  | 1.349                                                             | 1.656                                                           |
| $\mu$ [mm <sup>-1</sup> ]                         | 0.616                                                             | 6.336                                                           |
| $\theta$ range                                    | 2.101-25.02                                                       | 3.367-67.248                                                    |
|                                                   | -12 ≤ <i>h</i> ≤ 12                                               | -12 ≤ <i>h</i> ≤ 11                                             |
| index ranges                                      | -7 ≤ <i>k</i> ≤ 16                                                | -13 ≤ <i>k</i> ≤ 13                                             |
|                                                   | -17 ≤ <i>l</i> ≤ 17                                               | -13 ≤ <i>l</i> ≤ 15                                             |
| R1; wR <sub>2a</sub> [ <i>I</i> > 2σ( <i>I</i> )] | 0.0532; 0.1444                                                    | 0.0382; 0.0876                                                  |
| GOF                                               | 1.090                                                             | 1.020                                                           |

$${}^a R_1 = \Sigma | |F_o| - |F_c| | / \Sigma |F_o|, {}^b wR_2 = [\Sigma w(F_o^2 - F_c^2)^2] / \Sigma w(F_o^2)^2]^{1/2}$$

**Table S2** Selected bond lengths [ $\text{\AA}$ ] and angles [ $^\circ$ ] for **LCU-127** and **LCU-128**.

| <b>LCU-127</b>    |            |                   |            |
|-------------------|------------|-------------------|------------|
| Cd(1)-O(1)        | 2.597(4)   | Cd(1)-O(2)        | 2.297(3)   |
| Cd(1)-O(3A)       | 2.578(3)   | Cd(1)-O(4A)       | 2.341(3)   |
| Cd(1)-N(1)        | 2.333(4)   | Cd(1)-N(5B)       | 2.332(4)   |
| Cd(1)-N(9C)       | 2.375(4)   | O(2)-Cd(1)-O(1)   | 52.54(12)  |
| O(2)-Cd(1)-O(3A)  | 136.02(12) | O(2)-Cd(1)-O(4A)  | 84.54(11)  |
| O(2)-Cd(1)-N(1)   | 126.78(13) | O(2)-Cd(1)-N(5B)  | 89.87(14)  |
| O(4A)-Cd(1)-O(1)  | 129.83(11) | O(4A)-Cd(1)-N(9C) | 89.43(13)  |
| N(1)-Cd(1)-O(1)   | 81.15(13)  | N(1)-Cd(1)-O(3A)  | 95.43(13)  |
| N(1)-Cd(1)-O(4A)  | 147.92(13) | N(1)-Cd(1)-N(9C)  | 86.52(15)  |
| N(5B)-Cd(1)-O(4A) | 89.26(12)  | N(5B)-Cd(1)-N(1)  | 84.62(14)  |
| N(9C)-Cd(1)-O(1)  | 82.71(14)  | N(9C)-Cd(1)-O(3A) | 82.65(13)  |
| <b>LCU-128</b>    |            |                   |            |
| Cd(1)-O(1)        | 2.270(3)   | Cd(1)-O(3B)       | 2.376(3)   |
| Cd(1)-O(4B)       | 2.487(3)   | Cd(1)-O(8)        | 2.374(3)   |
| Cd(1)-N(1)        | 2.337(3)   | Cd(1)-N(6A)       | 2.349(3)   |
| N(1)-Cd(1)-N(6A)  | 101.13(12) | N(1)-Cd(1)-O(3B)  | 86.98(11)  |
| N(1)-Cd(1)-O(4B)  | 138.98(11) | N(1)-Cd(1)-O(8)   | 84.66(11)  |
| N(6A)-Cd(1)-O(3B) | 96.96(12)  | N(6A)-Cd(1)-O(4B) | 93.27(12)  |
| N(6A)-Cd(1)-O(8)  | 171.09(10) | O(8)-Cd(1)-O(4B)  | 86.56(10)  |
| O(1)-Cd(1)-N(6A)  | 88.15(11)  | O(1)-Cd(1)-O(3B)  | 133.78(11) |
| O(1)-Cd(1)-O(4B)  | 80.92(10)  | O(1)-Cd(1)-O(8)   | 83.03(10)  |
| O(3B)-Cd(1)-O(4B) | 53.00(10)  | O(8)-Cd(1)-O(3B)  | 90.05(11)  |

**Symmetry codes:** **LCU-127:** A:  $1+x, +y, +z$ ; B:  $2-x, 1-y, 2-z$ ; C:  $2-x, 1-y, 1-z$ ; **LCU-128:**A:  $+x, +y, -1+z$ ; B:  $1+x, +y, +z$ .



**Table S3** The reported CPs/MOFs as sensors for TC detection.

| Luminescent material                                                                 | Detection mechanism | Detection limit           | Reference |
|--------------------------------------------------------------------------------------|---------------------|---------------------------|-----------|
| Eu-L                                                                                 | turn off            | 0.43 $\mu\text{M}$        | 3         |
| LCU-123                                                                              | turn off            | 0.552 $\mu\text{M}$       | 54        |
| ZIF-8@SA                                                                             | turn on             | 58.46 nM                  | 56        |
| Eu:Tb-CP                                                                             | turn on             | 0.1498 $\mu\text{M}$      | 57        |
| Laponite-Eu-Cit                                                                      | turn on             | 9.5 nM                    | 58        |
| $\{[\text{Cd}(2\text{-F-tzba})(\text{H}_2\text{O})] \cdot 1.5\text{H}_2\text{O}\}_n$ | turn off            | 8.97 mmol L <sup>-1</sup> | 59        |
| $\{[\text{Cd}(3\text{-F-tzba})(\text{H}_2\text{O})] \cdot 1.5\text{H}_2\text{O}\}_n$ | turn off            | 9.39 mmol L <sup>-1</sup> | 59        |
| $\{[\text{Zn}(\text{bdc})(4,4'\text{-bidpe})] \cdot \text{H}_2\text{O}\}_n$          | turn off            | $3.72 \times 10^{-7}$ M   | 60        |
| <b>LCU-127</b>                                                                       | turn off            | 0.18 $\mu\text{M}$        | this work |

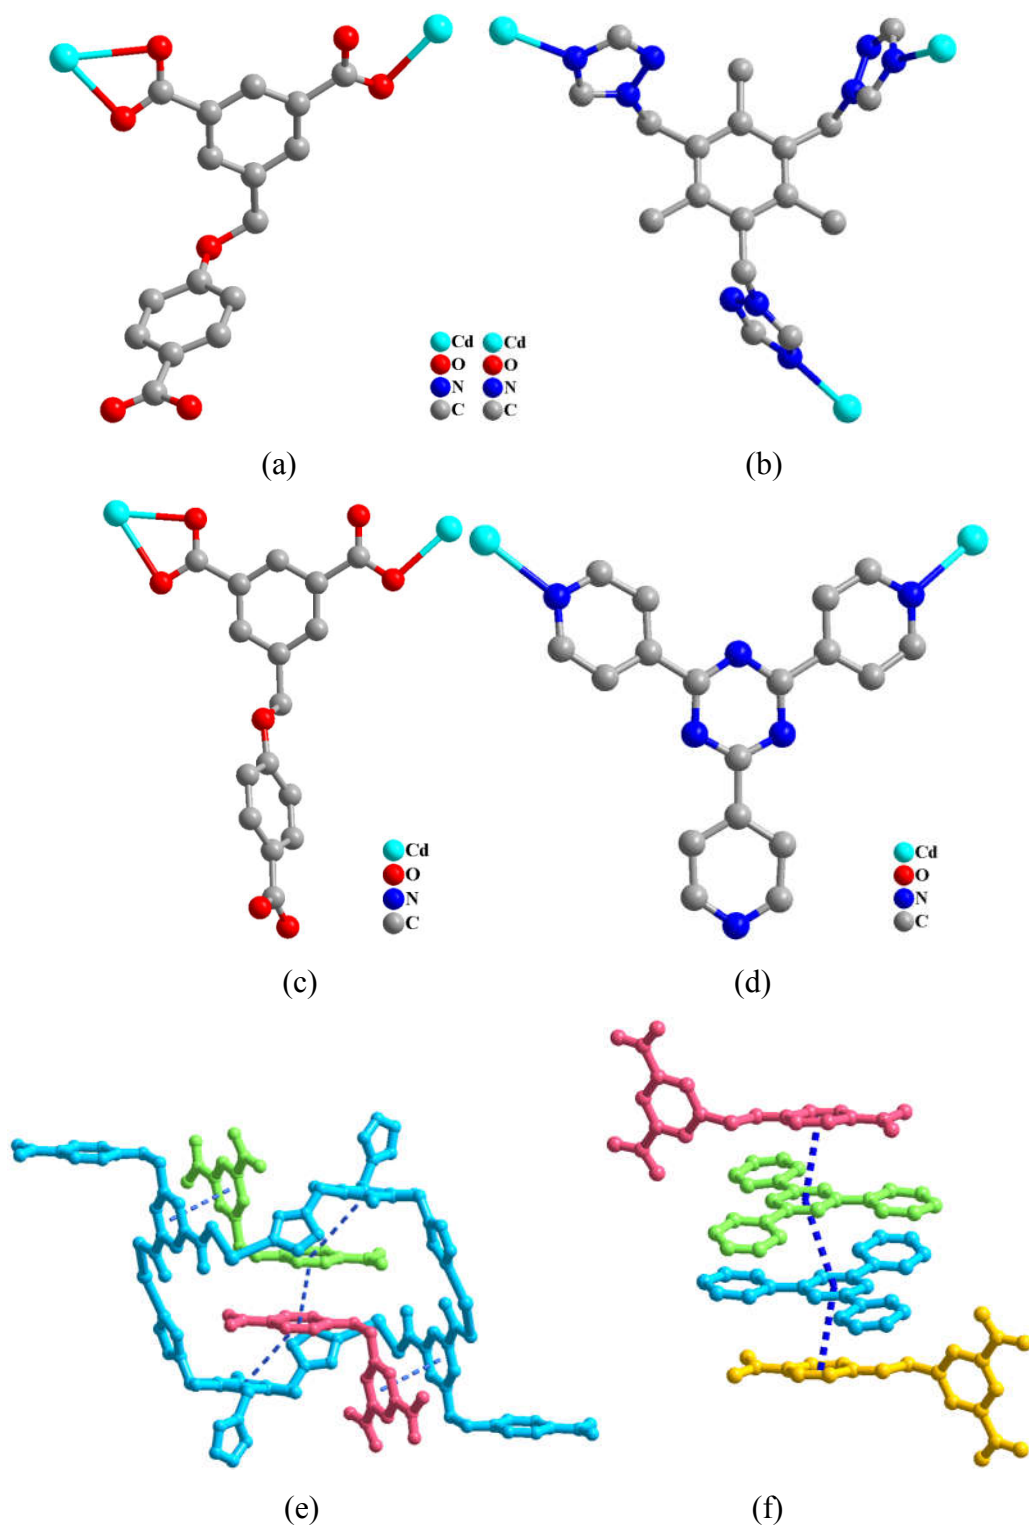

**Fig. S1** (a) and (c) Coordination mode of H<sub>3</sub>L in LCU-127 and LCU-128, respectively. (b) and (d) Coordination mode of ttytb and tpytz in LCU-127 and LCU-128, respectively. (e) and (f) Stacking interactions of LCU-127 and LCU-128 between adjacent layers, respectively.

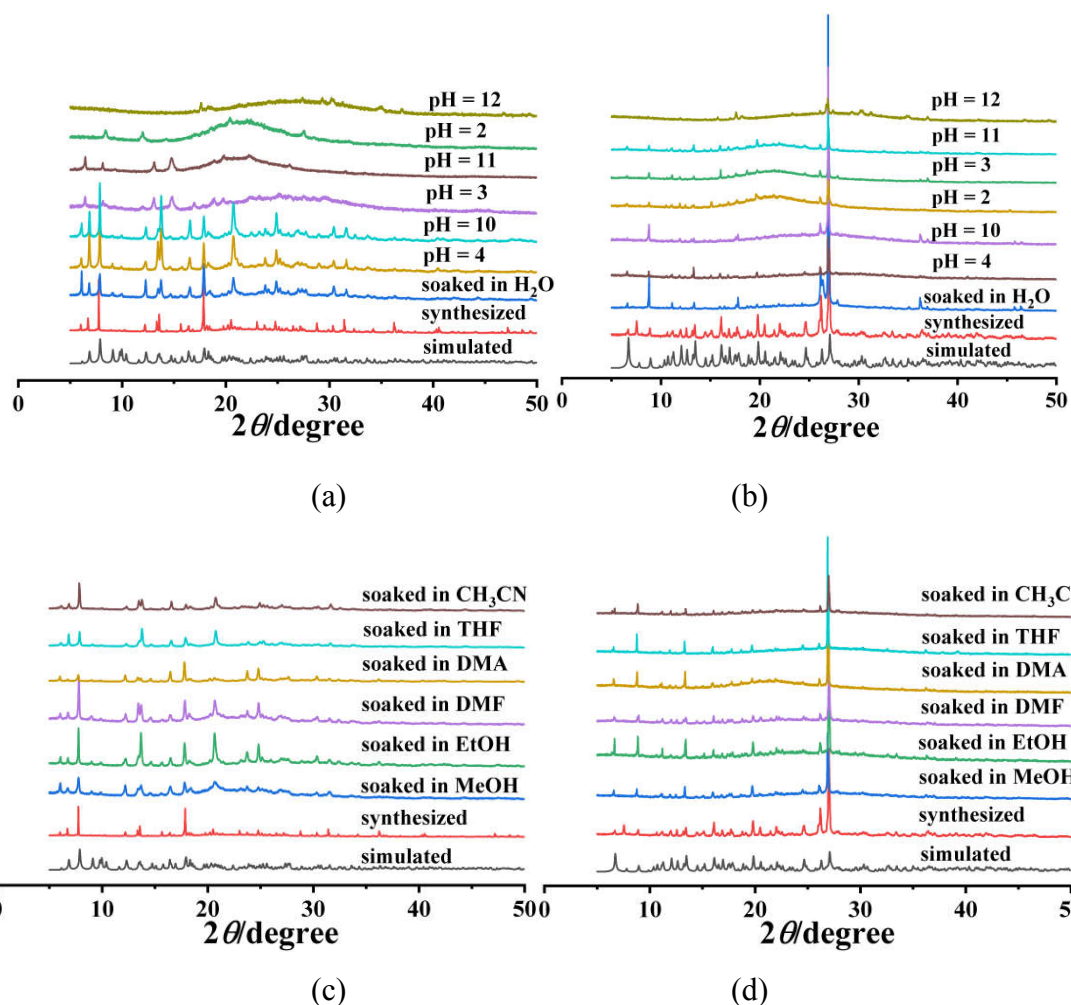

**Fig. S2** (a) and (b) PXR D spectra of LCU-127 and LCU-128 after soaking in H<sub>2</sub>O and different pH solutions, respectively. (c) and (d) PXR D spectra of LCU-127 and LCU-128 after soaking in different organic solvents for three days, respectively.

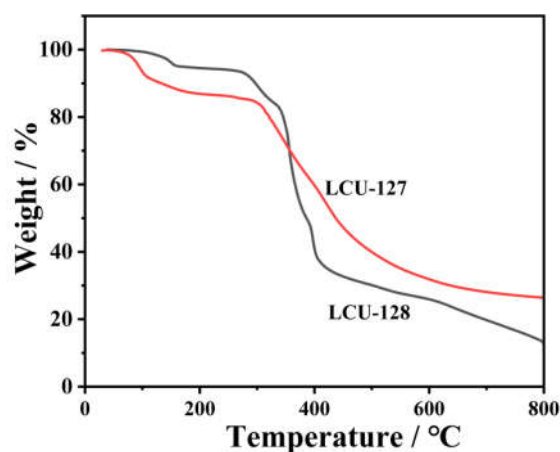

**Fig. S3** TG of LCU-127 and LCU-128, respectively.

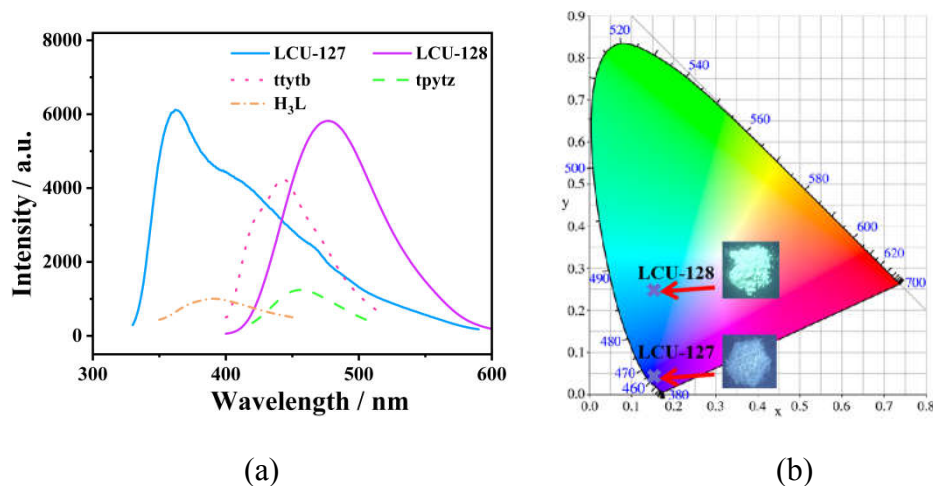

**Fig. S4** (a) Solid-state emission spectra and (b) CIE coordinates of LCU-127 and LCU-128.

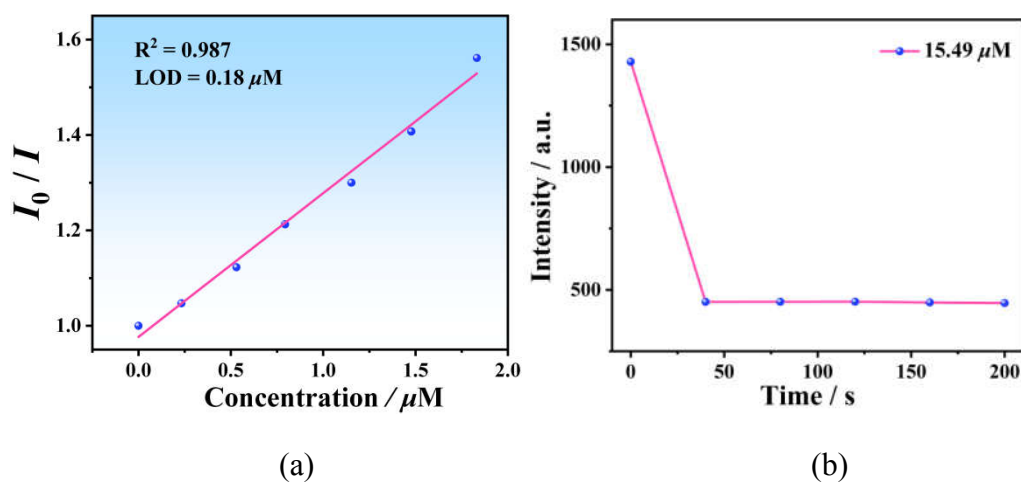

**Fig. S5** (a) The detection limit calculation and (b) time-dependent response of LCU-128 toward TC.

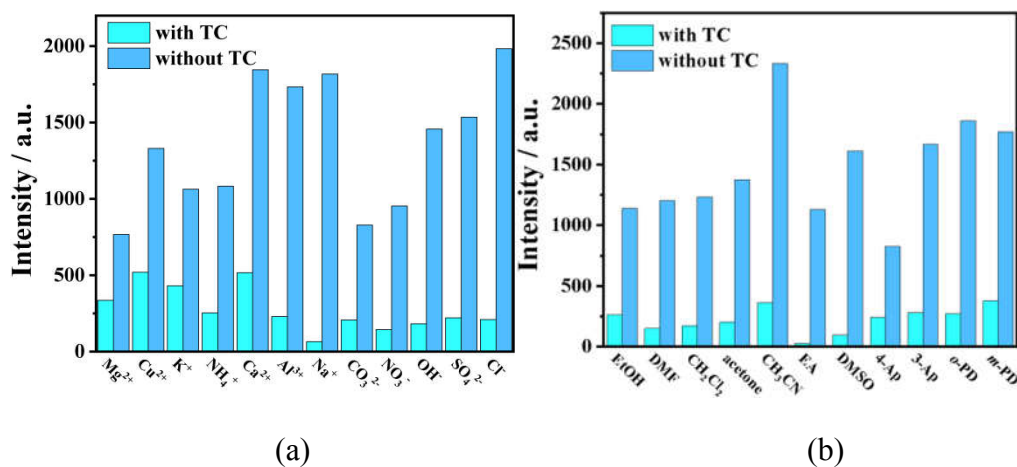

**Fig. S6** (a) and (b) The luminescence intensity of LCU-128 suspensions of common cations, anions, and some common organic matters with and without TC, respectively.

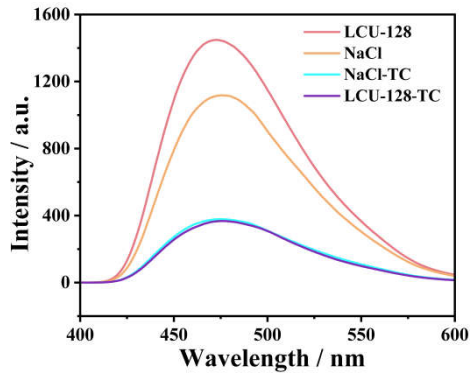

(a)

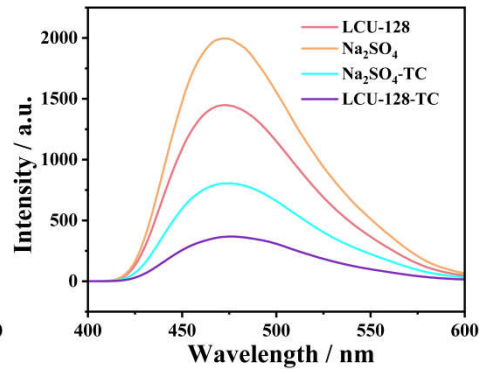

(b)

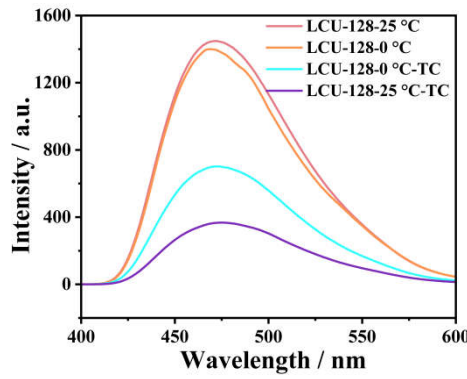

(c)

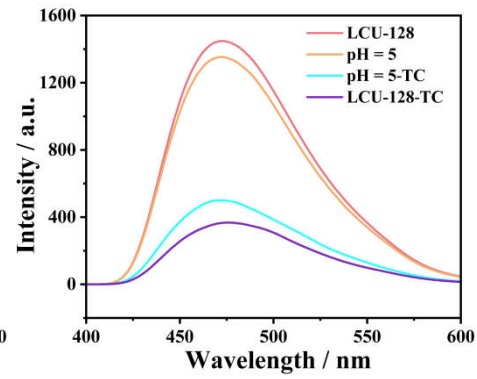

(d)

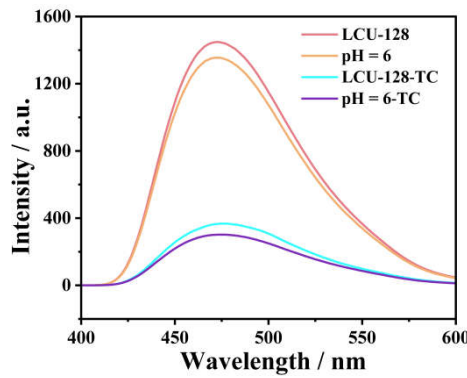

(e)

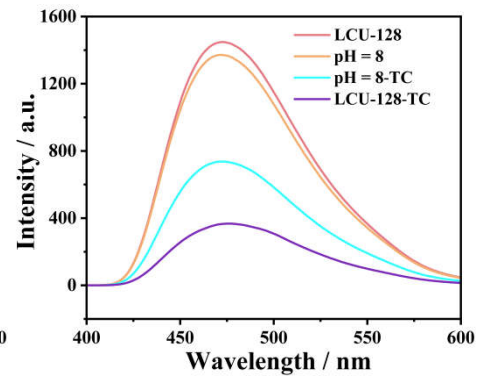

(f)

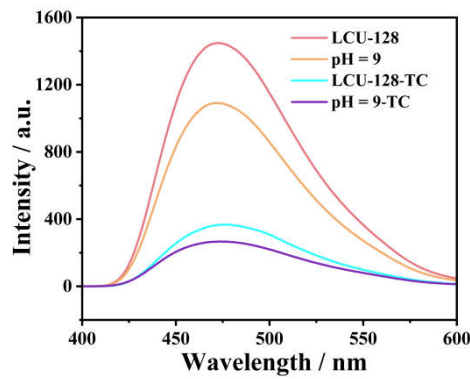

(g)

**Fig. S7** (a)-(g) Luminescence intensity of LCU-128 toward TC in NaCl, Na<sub>2</sub>SO<sub>4</sub> solutions, temperature at 0 °C and room temperature (25 °C) and pH at 5, 6, 8, and 9, respectively.

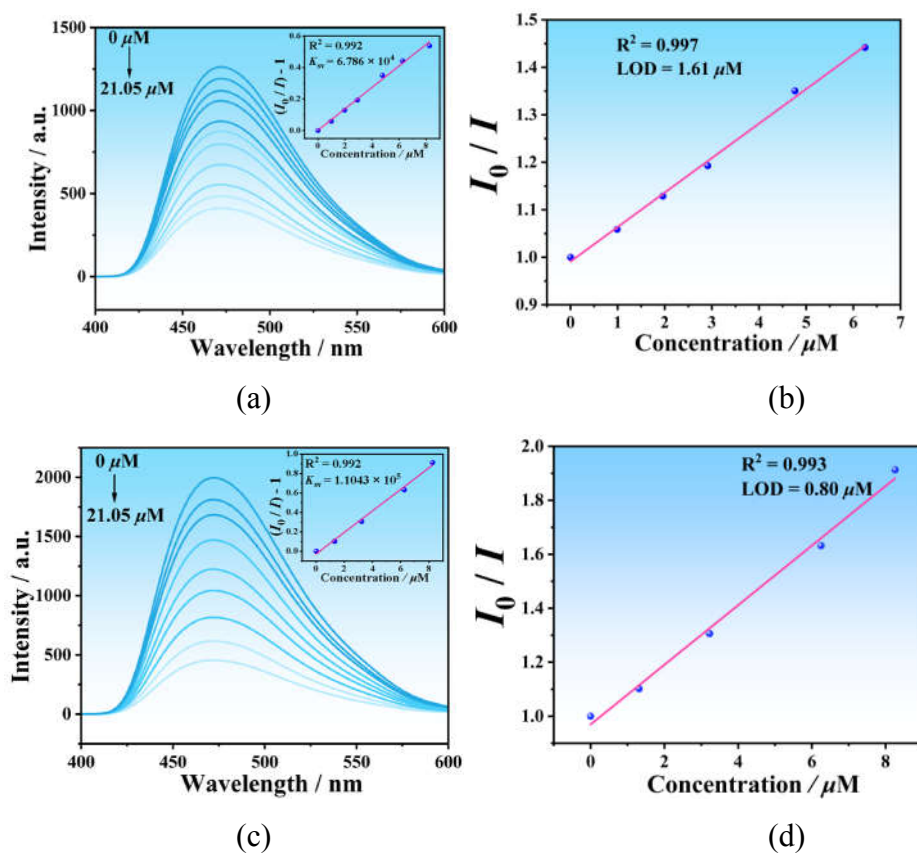

**Fig. S8** (a) and (c) Emission spectra of LCU-128 dispersed in NaCl and Na<sub>2</sub>SO<sub>4</sub> upon incremental addition of TC (insets: the corresponding S-V plots), respectively. (b) and (d) The detection limit calculation of LCU-128 toward TC in NaCl and Na<sub>2</sub>SO<sub>4</sub> solutions, respectively.

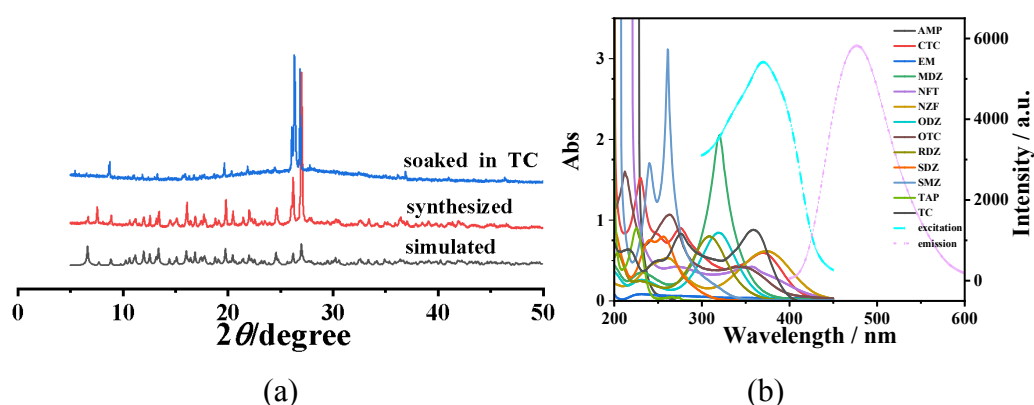

**Fig. S9** (a) PXRD spectra of LCU-128 after soaking in aqueous solution of TC. (b) Excitation and emission spectra of LCU-128 and UV-vis absorption spectra of antibiotic solutions (10<sup>-4</sup> M).



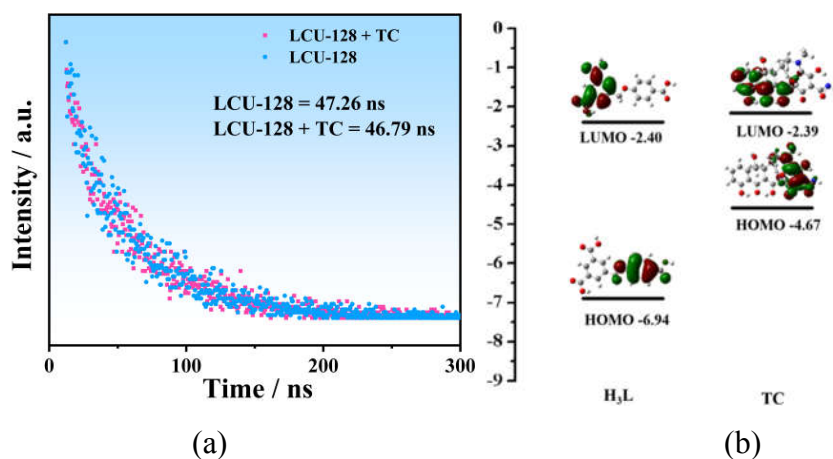

**Fig. S10** (a) Fluorescence lifetimes of **LCU-128** in the presence and absence of TC. (b) HOMO and LUMO energy levels for **H<sub>3</sub>L** and **TC**.

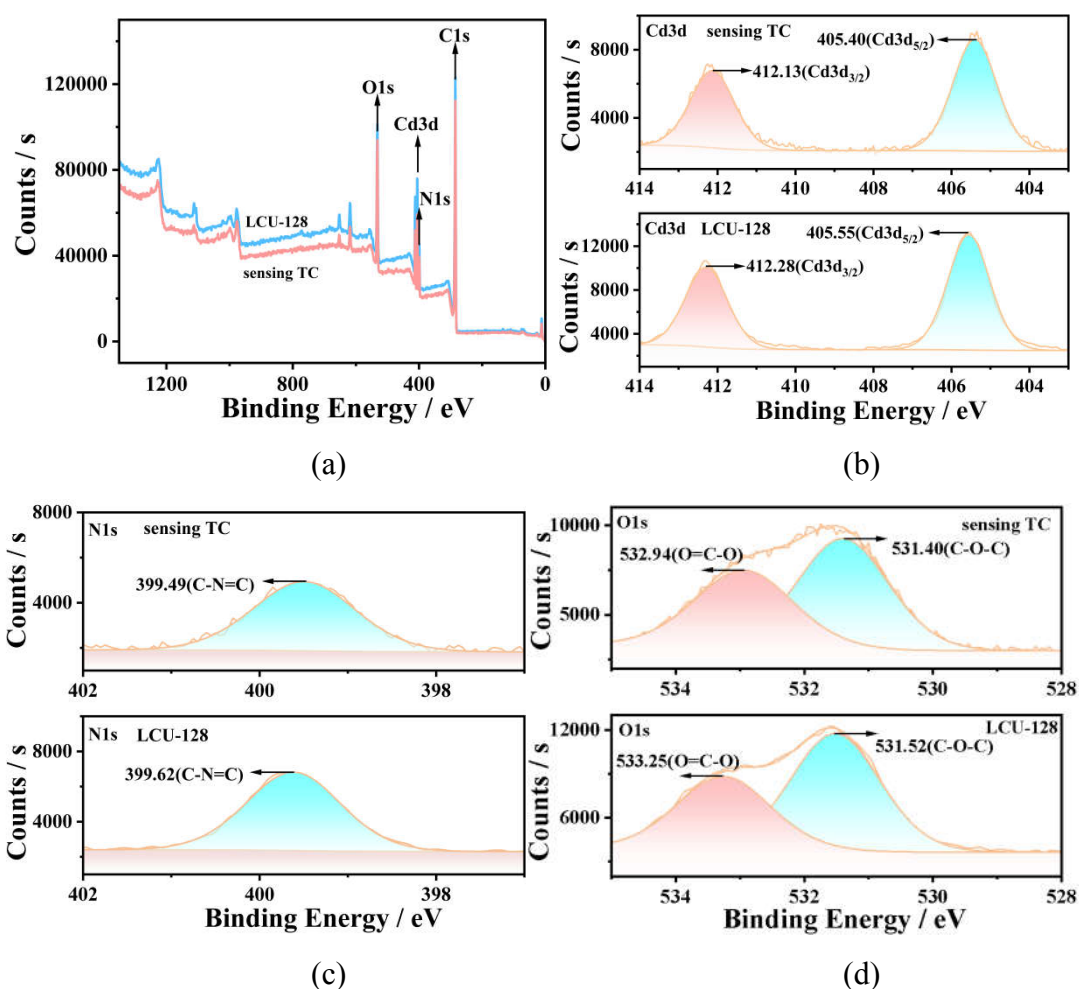

**Fig. S11** (a)-(d) XPS spectra of **LCU-128** before and after immersion in TC and high resolution regions of Cd3d, N1s and O1s.

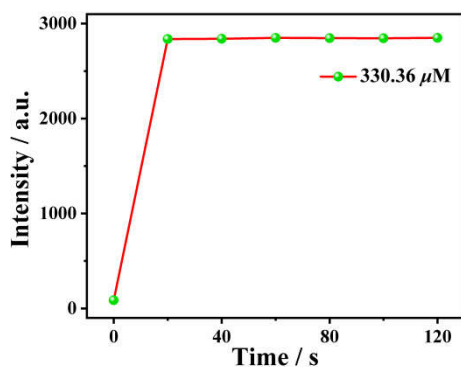

**Fig. S12** Time-dependent intensity of LCU-127 toward  $Tb^{3+}$  at 545 nm.

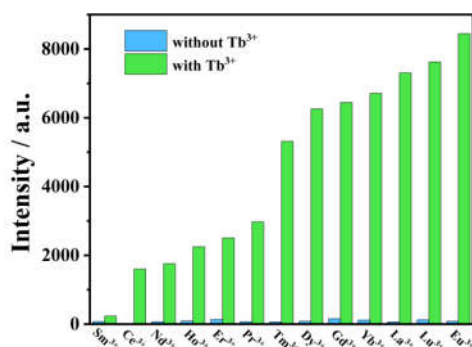

**Fig. S13** Luminescence intensity of LCU-127 in  $Ln^{3+}$  aqueous solutions with or without  $Tb^{3+}$  at 545 nm.

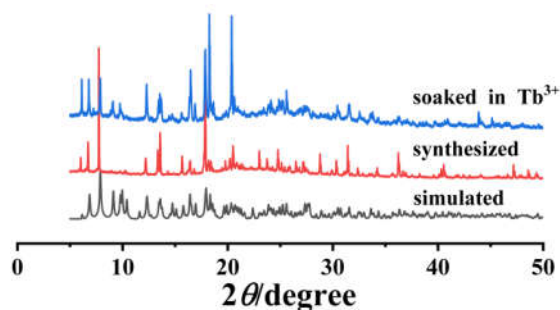

**Fig. S14** PXRD spectra of LCU-127 after soaking in aqueous solution of  $Tb^{3+}$ .

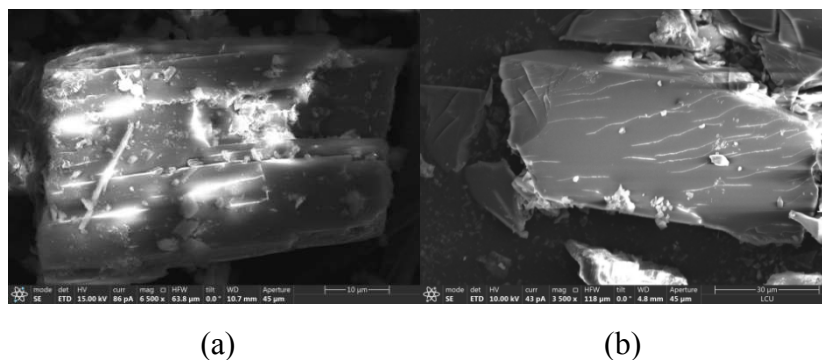

**Fig. S15** (a) and (b) SEM images of LCU-127 before and after immersing in  $10^{-3}$  M  $Tb^{3+}$  aqueous solutions for three days, respectively.



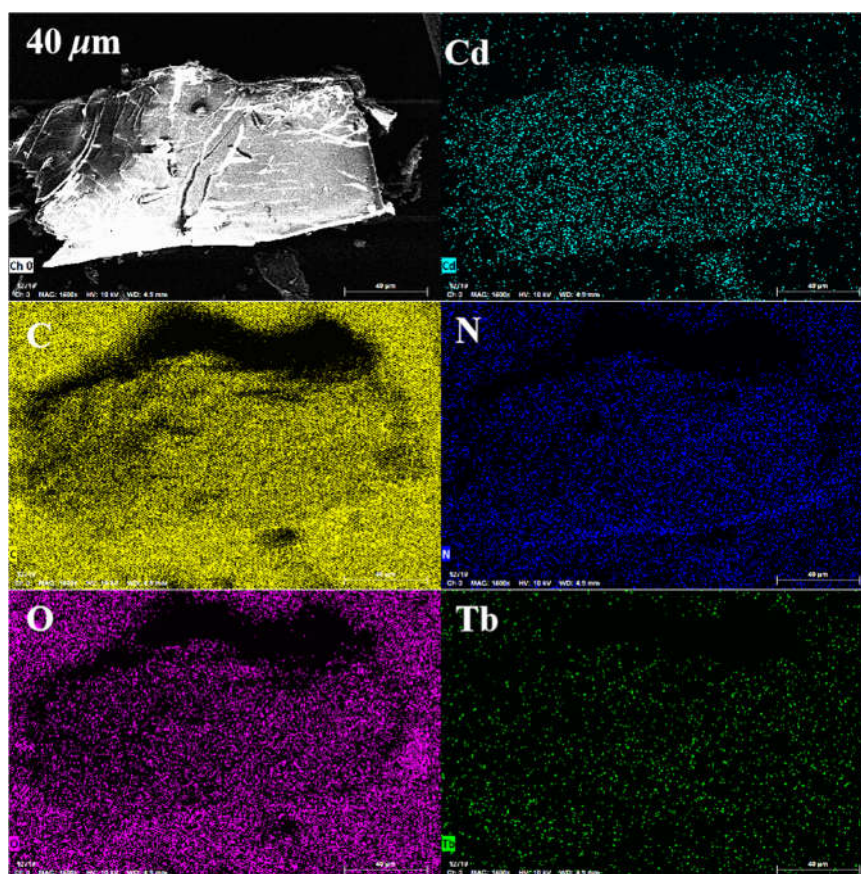

**Fig. S16** EDS mapping of LCU-127 after immersing in  $10^{-3}$  M  $Tb^{3+}$  aqueous solutions for three days.

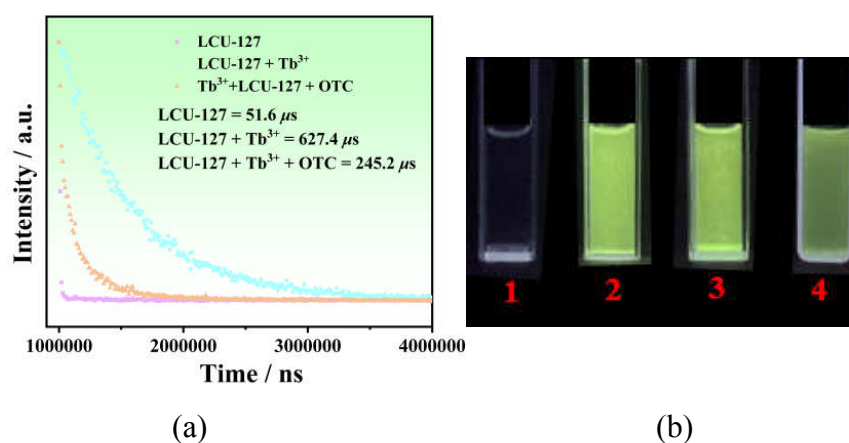

**Fig. S17** (a) Luminescence lifetime curves of LCU-127,  $Tb^{3+}$ +LCU-127 and  $Tb^{3+}$ +LCU-127 in OTC aqueous solutions. (b) The photographs of LCU-127 in different solutions under 254 nm UV lamp (1: LCU-127- $H_2O$ ; 2: LCU-127- $Tb^{3+}$ ; 3:  $Tb^{3+}$ +LCU-127-TC, 4:  $Tb^{3+}$ +LCU-127-OTC)).

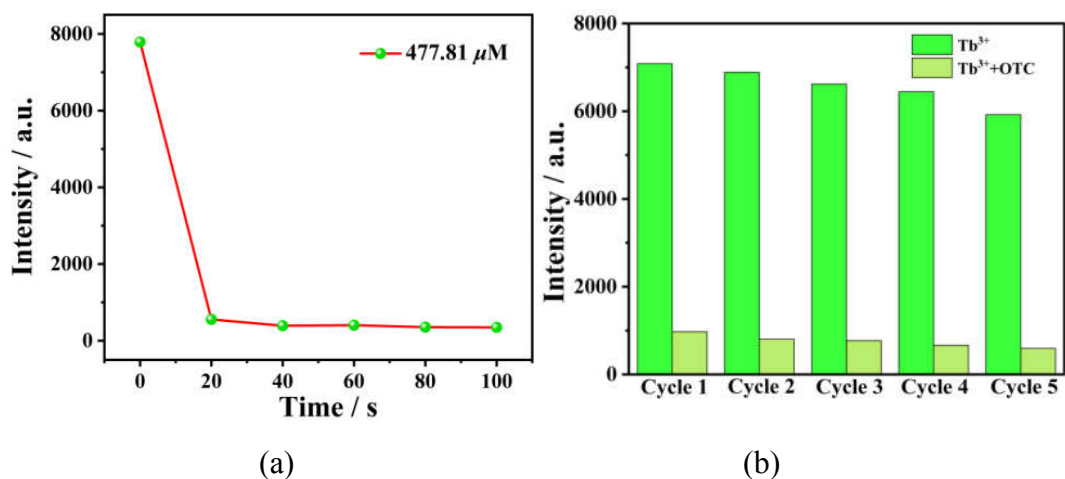

**Fig. S18** (a) Time-dependent response of  $\text{Tb}^{3+}$ +LCU-127 toward OTC. (b) The recycling experiment of  $\text{Tb}^{3+}$ +LCU-127 toward OTC within five runs.

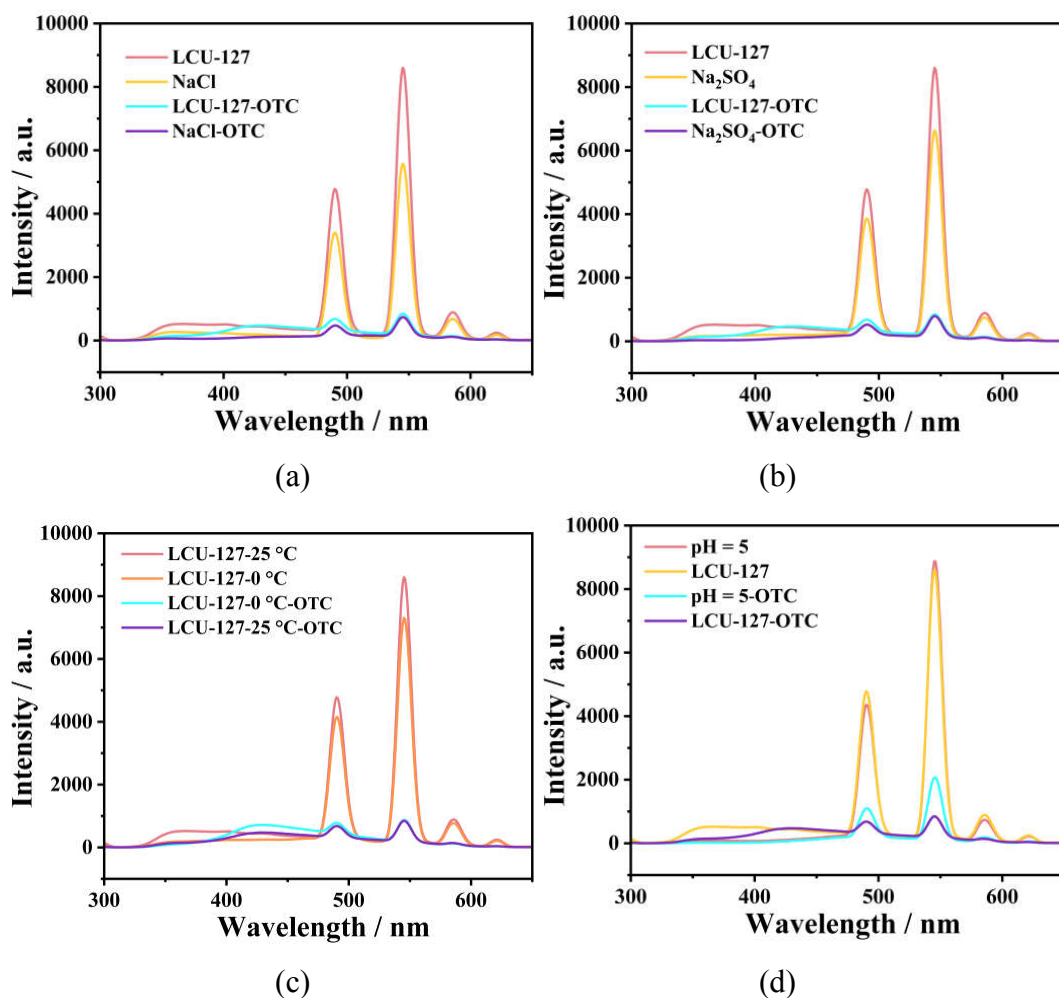

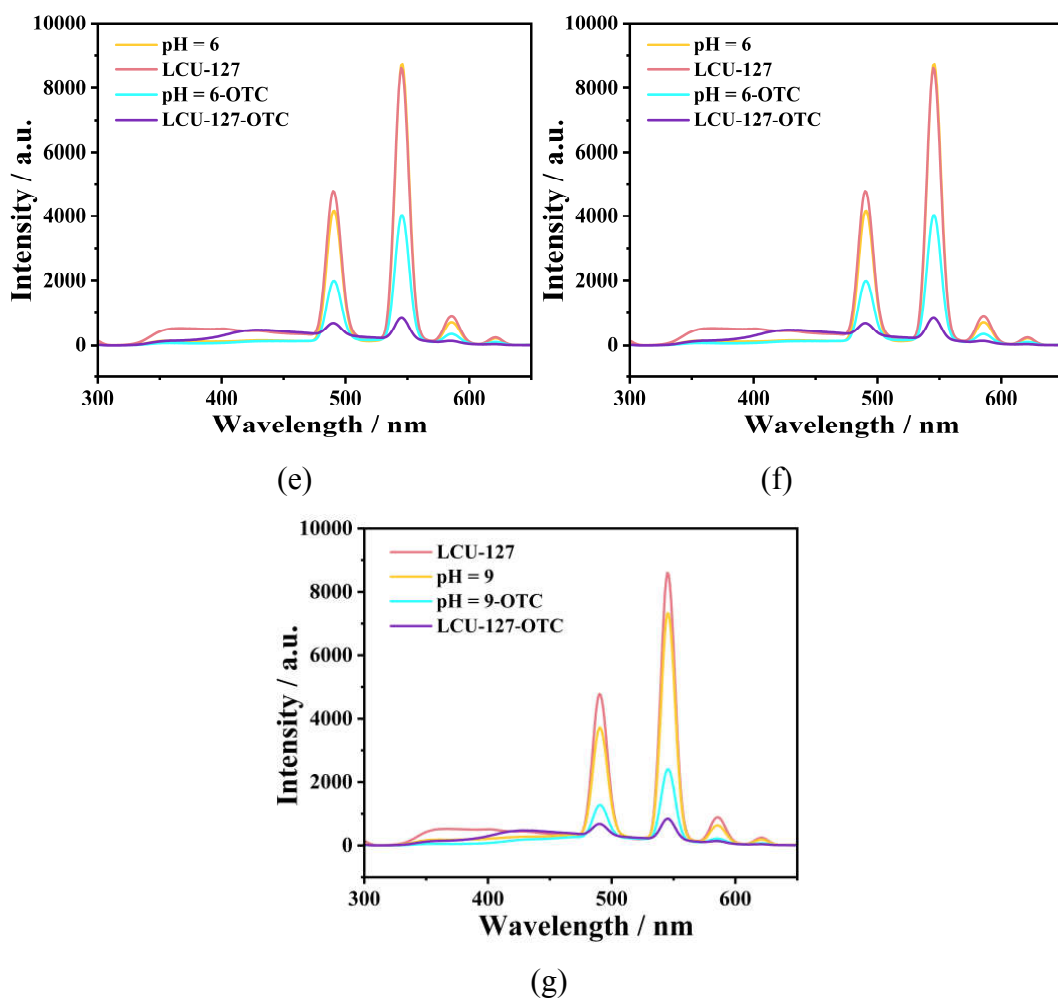

**Fig. S19** (a)-(g) Luminescence intensity of  $Tb^{3+}$ +LCU-127 in NaCl,  $Na_2SO_4$  solutions, at 0 °C and room temperature (25 °C) as well as in aqueous solutions with pH value of 5, 6, 8, and 9, respectively.

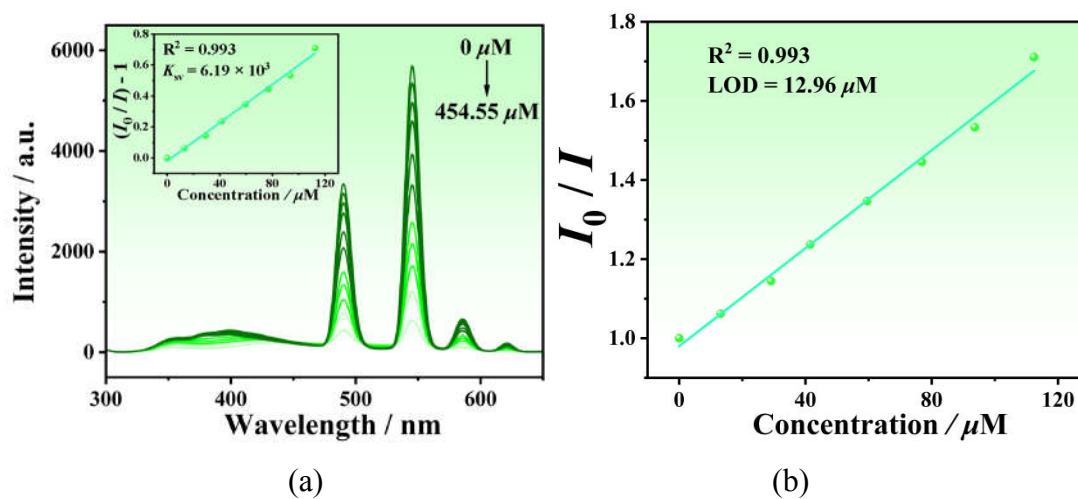

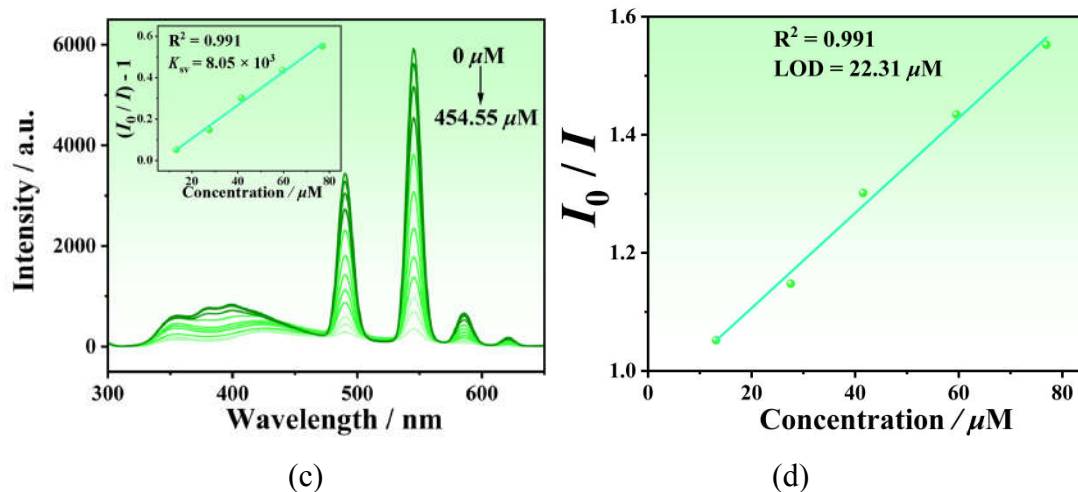

**Fig. S20** (a) and (c) Emission spectra of  $\text{Tb}^{3+}$ +LCU-127 dispersed in NaCl and  $\text{Na}_2\text{SO}_4$  solutions upon incremental addition of OTC (insets: the corresponding S-V plots), respectively. (b) and (d) The detection limit calculation of  $\text{Tb}^{3+}$ +LCU-127 toward OTC in NaCl and  $\text{Na}_2\text{SO}_4$  solutions, respectively.

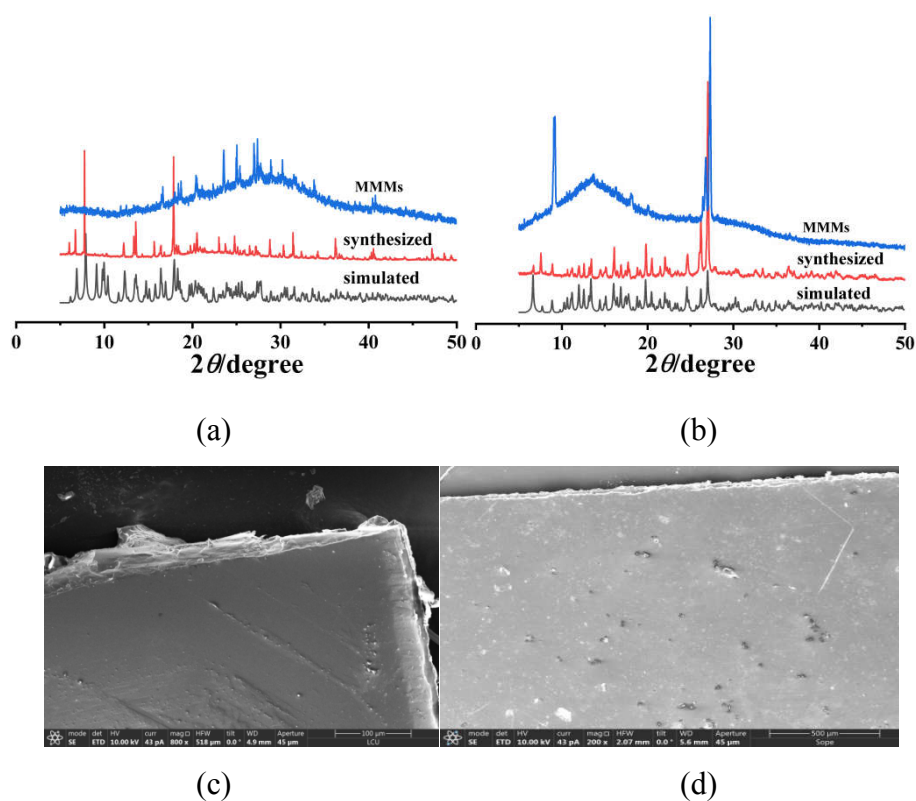

**Fig. S21** (a) and (c) XRD patterns and SEM image of MMM based on  $\text{Tb}^{3+}$ +LCU-127. (b) and (d) XRD patterns and SEM image of MMM based on LCU-128.
